# Supplementary material for: Regulation of effector function of CNS autoreactive CD4 T cells through inhibitory receptors and IL-7Rα
Source: Springer Nature journal article supplement (doi:10.1186/s12974-016-0768-3), 2016-12-01

**A**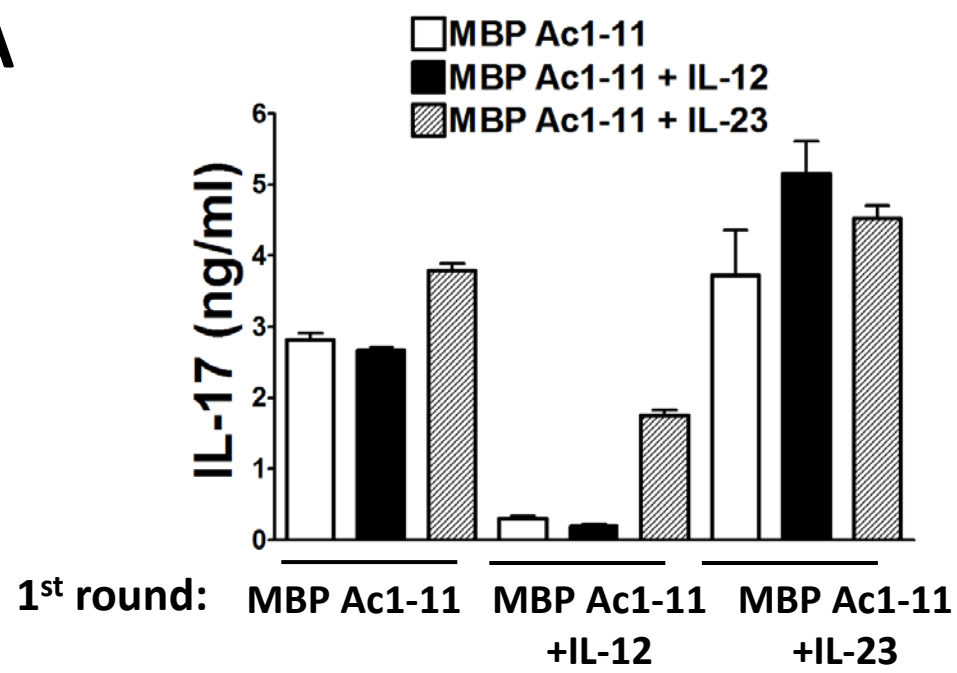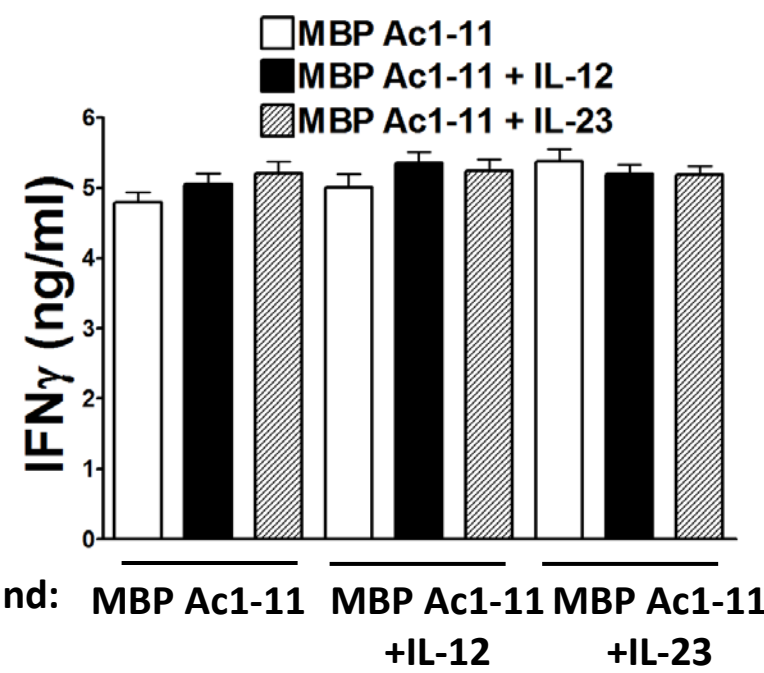**B** 1<sup>st</sup> round – MBP Ac1-11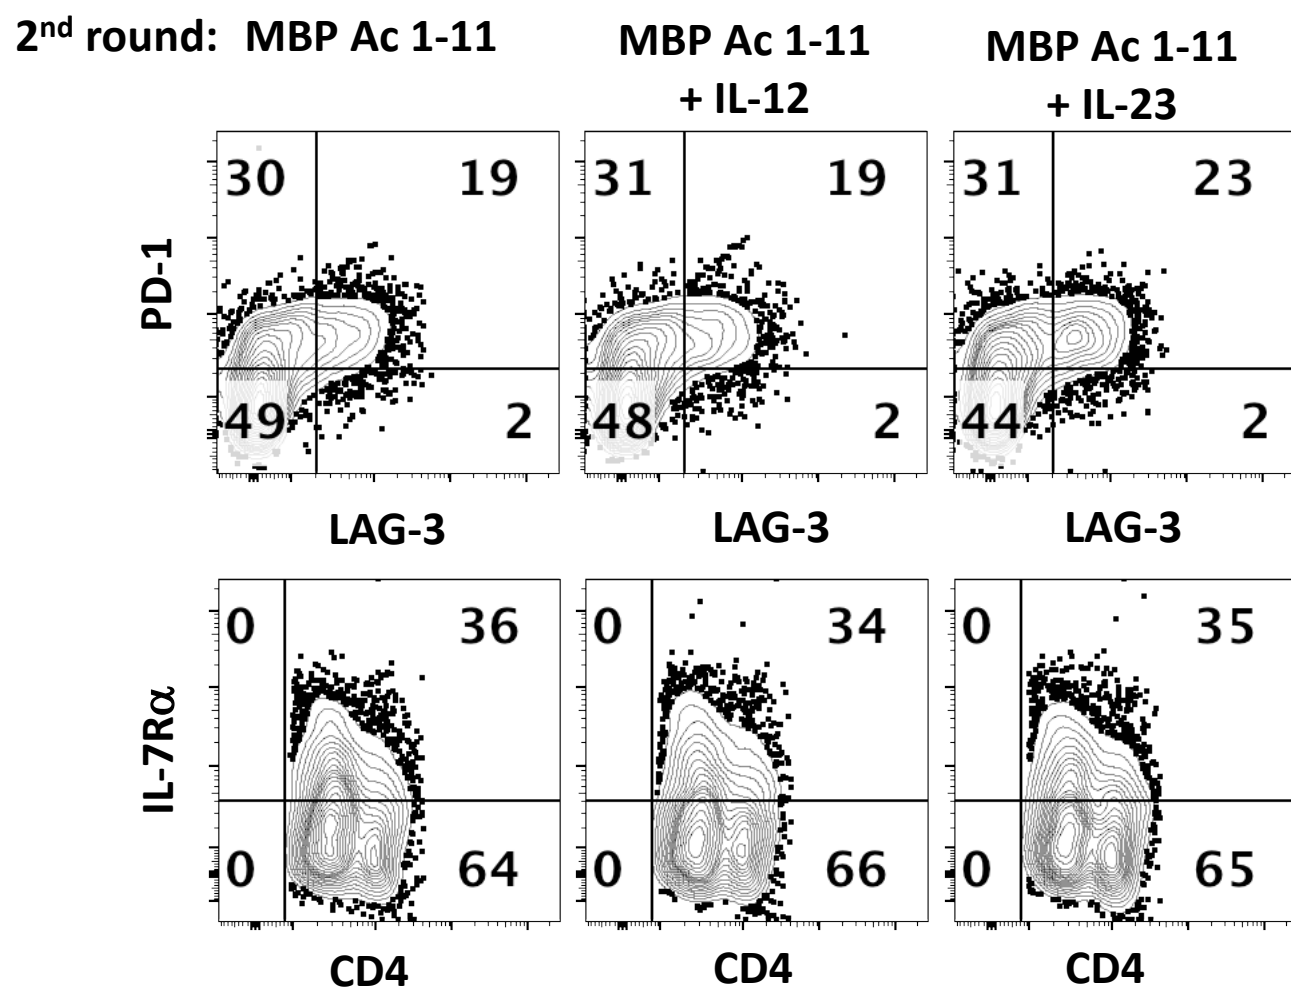**C** 1<sup>st</sup> round – MBP Ac1-11 + IL-12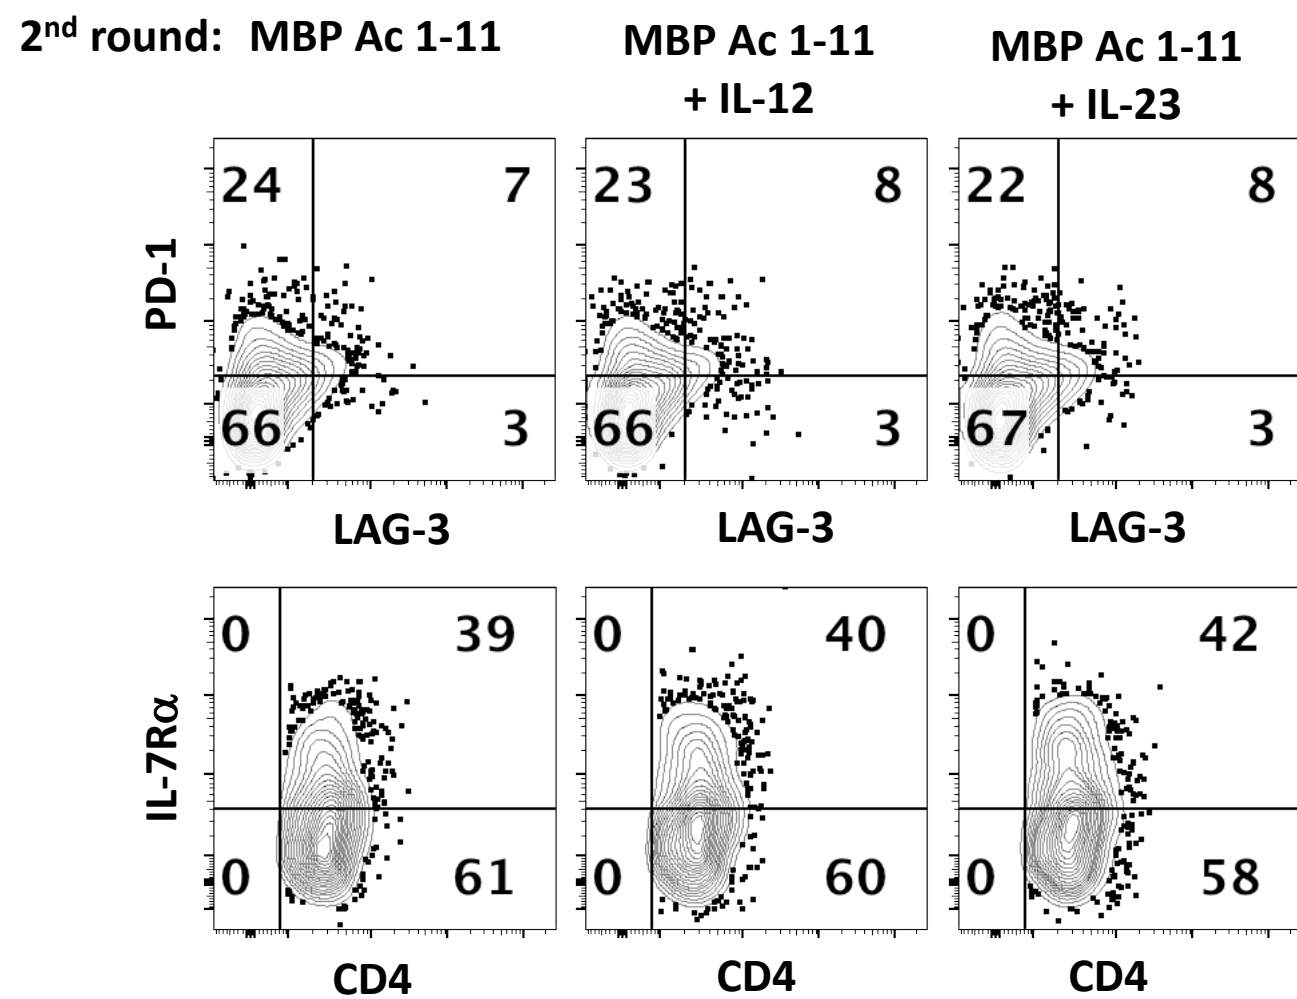**D** 1<sup>st</sup> round – MBP Ac1-11 + IL-23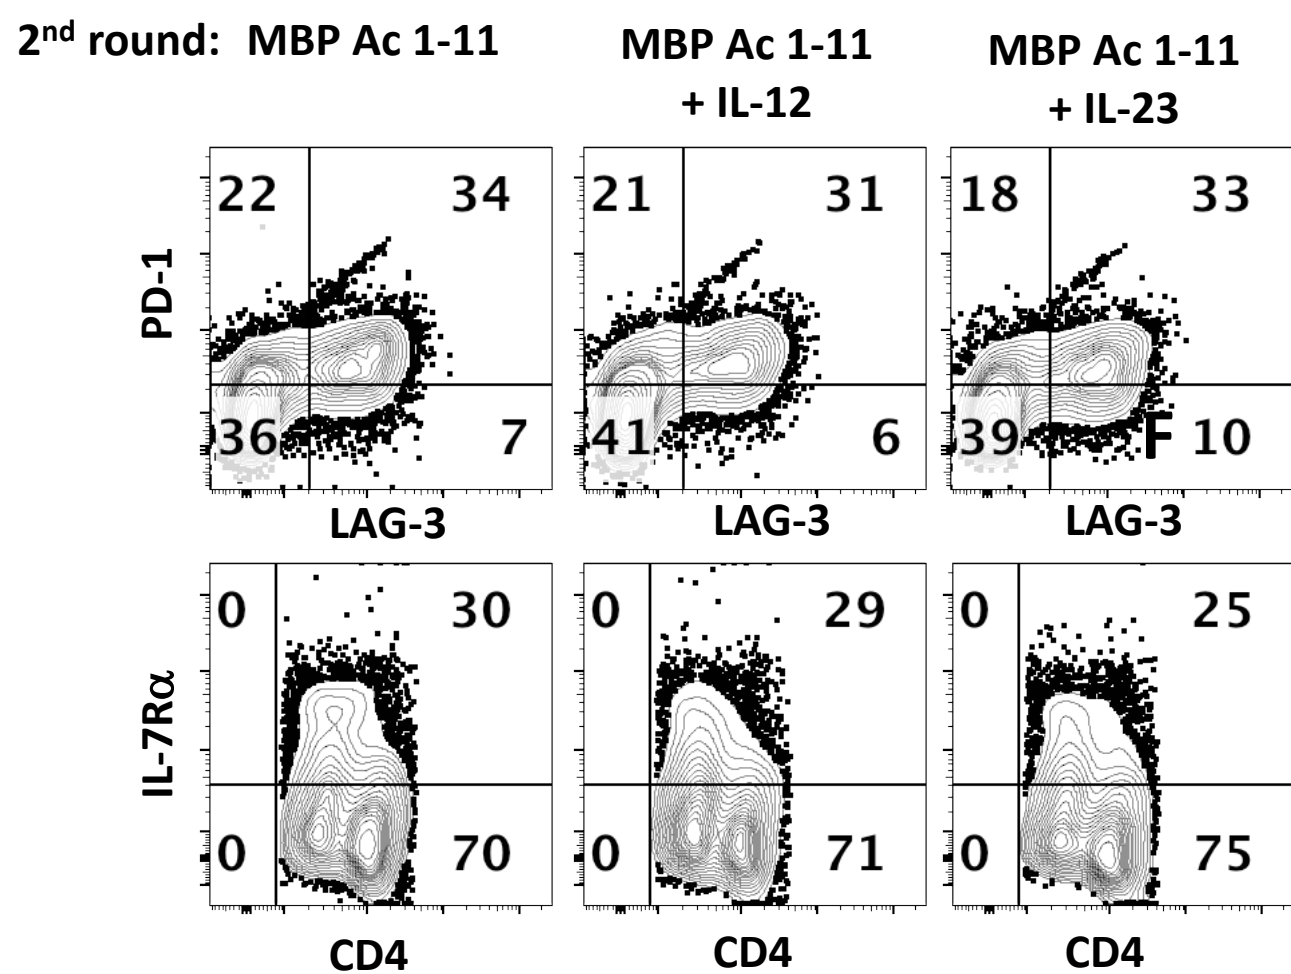

Supplement: MOESM1 [file 11108906]
